# Supplementary material for: Systematic interrogation of mutation groupings reveals divergent downstream expression programs within key cancer genes
Source: PubMed Central journal article supplement (PMC8101181; doi:10.1186/s12859-021-04147-y), 2021-05-06

# AUCs in training cohort

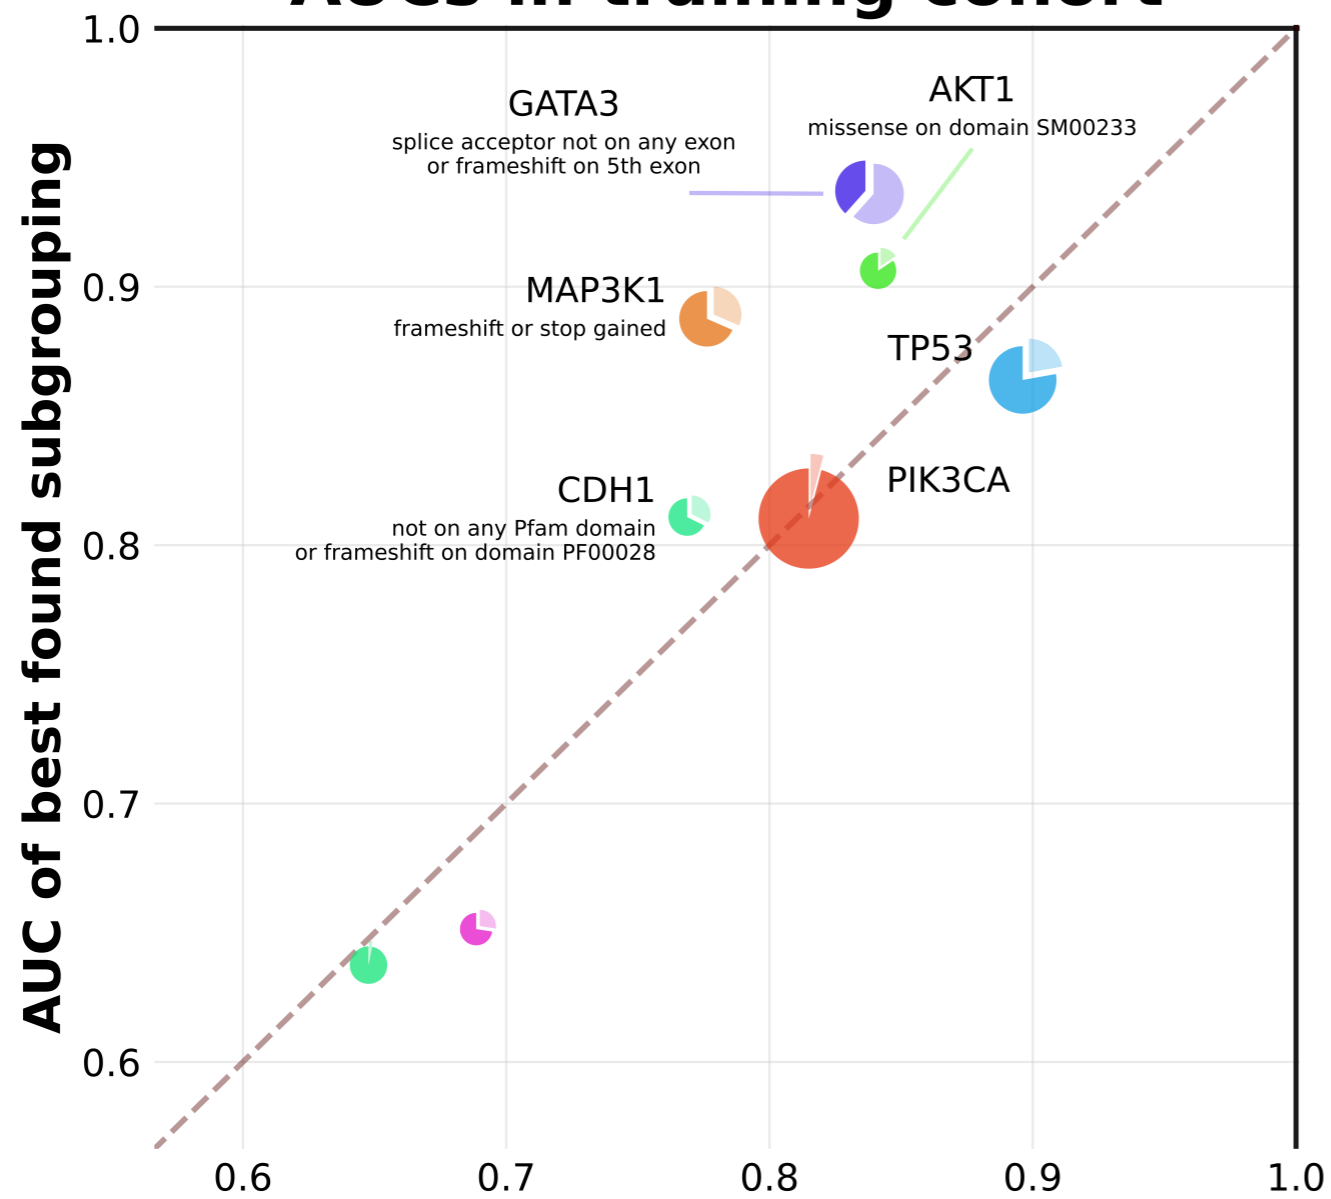

# AUCs in transfer cohort

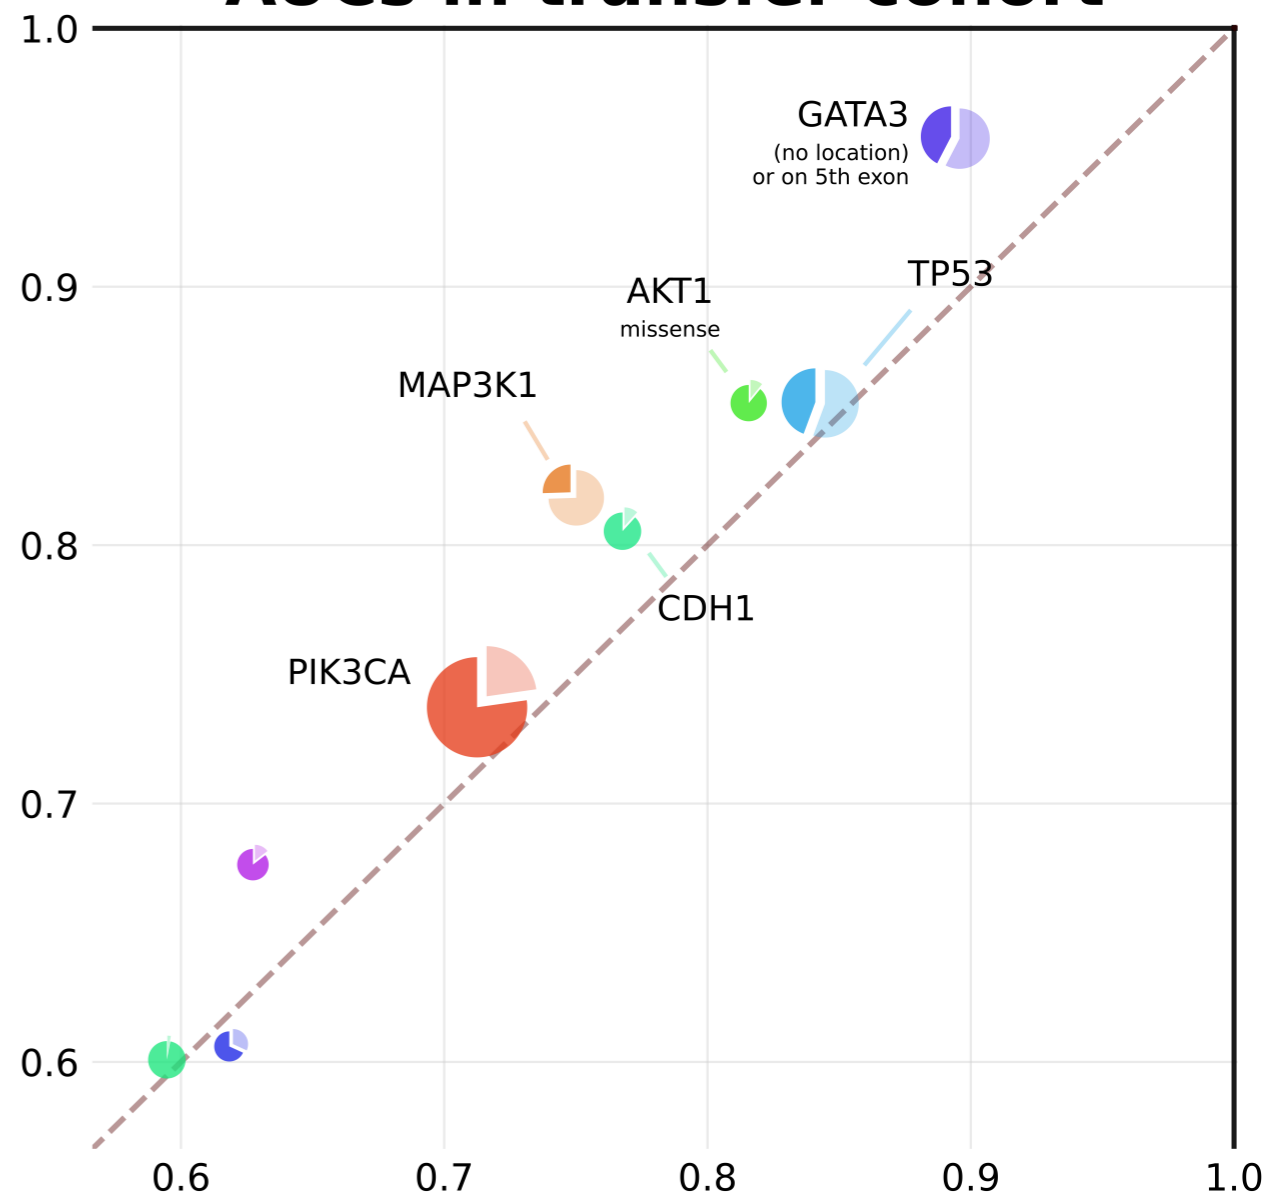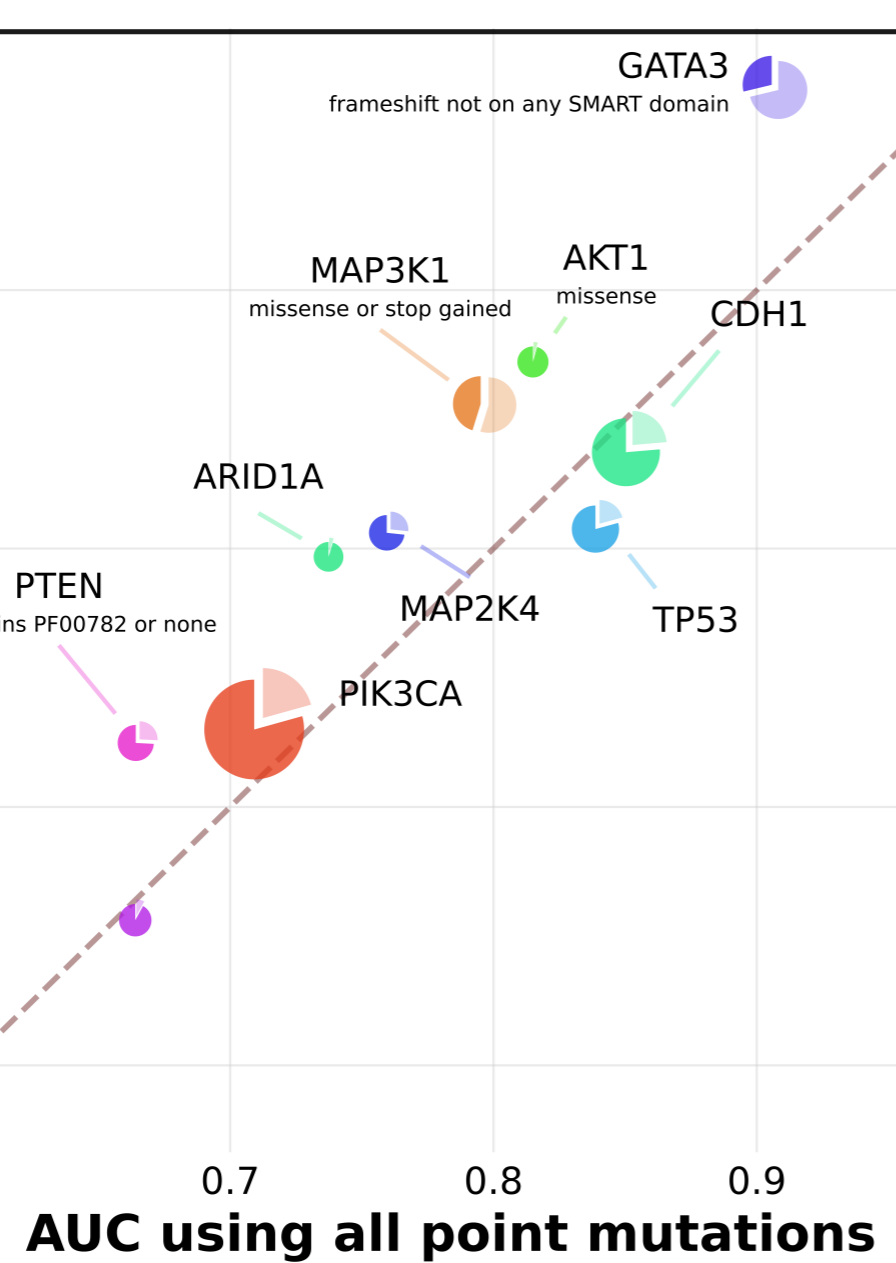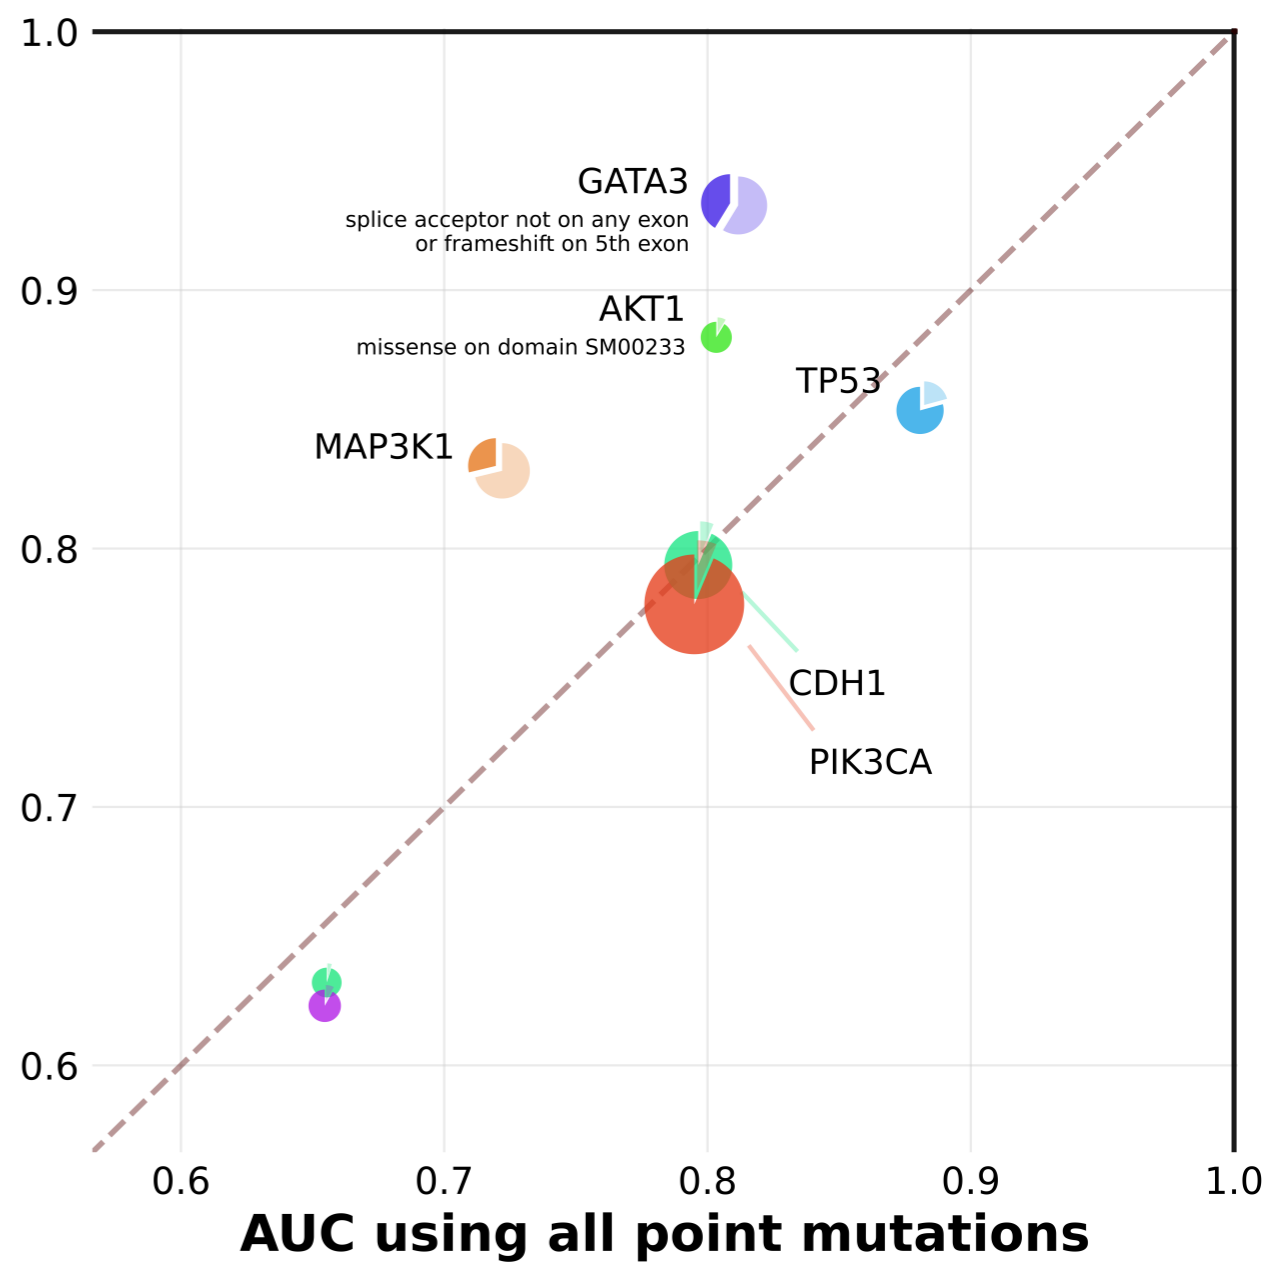

Supplement: 12859_2021_4147_MOESM10_ESM.pdf [file 12859_2021_4147_MOESM10_ESM.pdf]
